# Supplementary material for: Exosomes Derived from Stem Cells from the Apical Papilla Promote Dentine-Pulp Complex Regeneration by Inducing Specific Dentinogenesis
Source: Stem Cells Int. 2020 May 27;2020:5816723. doi: 10.1155/2020/5816723 (PMC7273441; doi:10.1155/2020/5816723)
Supplement: Supplementary Materials — Supplementary Figure 1: identification of stem cells of apical papilla (SCAP). (A) SCAP formed colony-forming units in primary culture. (B) Alizarin red S staining showed the formation of mineralised nodules. (C) Oil red O staining showed lipid droplet formation. (D) Flow cytometric analysis showed that SCAP were positive for CD29, CD44, CD105, and CD146 but negative for CD34 and CD45. Supplementary Figure 2: identification of bone marrow mesenchymal stem cells (BMMSCs). (A) The morphology of BMMSCs. (B) Alizarin red S staining showed the formation of mineralised nodules. (C) Oil red O staining showed lipid droplet formation. [file 5816723.f1.zip]

Archive with 2 entries (2 files):
- Supplementary Figure 1.pptx
- Supplementary Figure 2.pptx
